# Supplementary material for: BMAL1 Knockdown Leans Epithelial–Mesenchymal Balance toward Epithelial Properties and Decreases the Chemoresistance of Colon Carcinoma Cells
Source: MDPI journal article supplement (doi:10.3390/ijms22105247), 2021-05-16
Supplement: s1 [file s1]

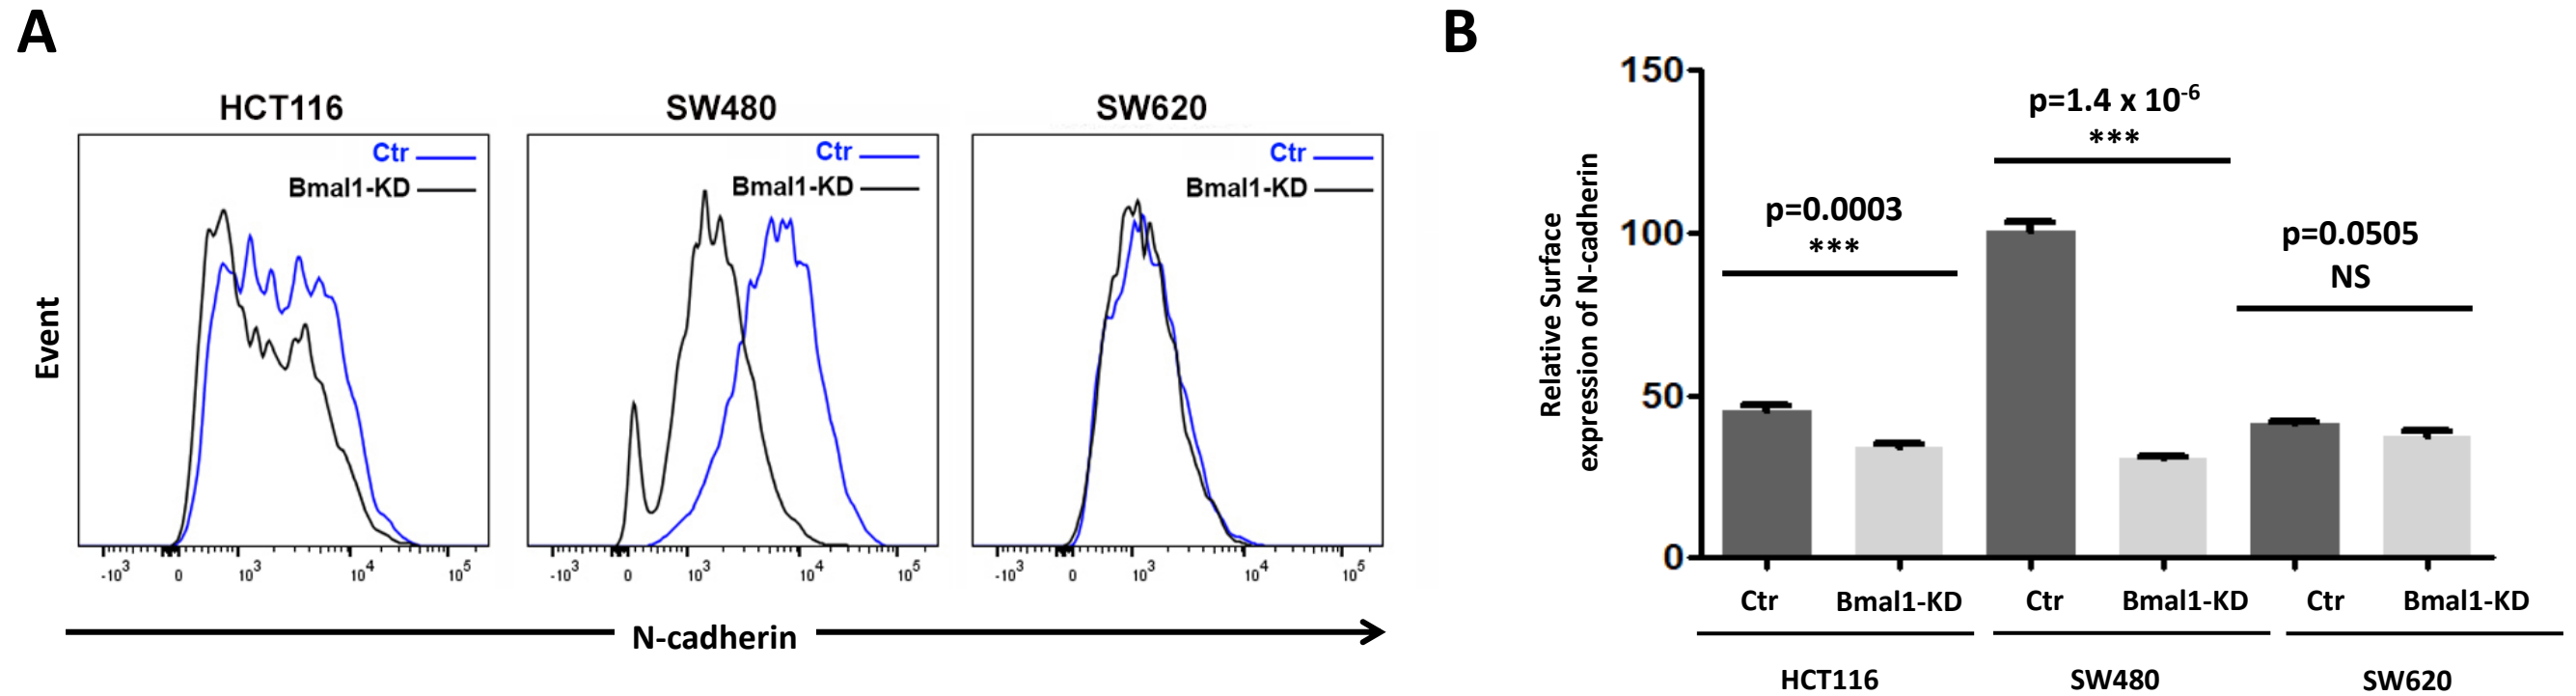

**Figure S1.** BMAL1-KD decreases N-cadherin plasma membrane expression of CRC cells

(A) A representative staining of the surface expression of N-cadherin (CD325) by flow cytometry on different BMAL1-KD (black histogram) and control (blue histogram) CRC cells. (B) BMAL1-KD leads to a decrease in the expression of membranous N-cadherin on the two primary CRC cell lines compared to their appropriate control cell lines (4-6 independent experiments, \* $p < 0.05$ , \*\*\* $p < 0.001$ ). Data are shown as means  $\pm$  SEM.

| Gene                     | Sequence |                          |
|--------------------------|----------|--------------------------|
| <b><i>Bmal1</i></b>      | FWD      | AAGGATGGCTGTTCAGCACATGA  |
|                          | REV      | CAAAAATCCATCTGCTGCCCTG   |
| <b><i>E-cadherin</i></b> | FWD      | TGCCCAGAAAATGAAAAAGG     |
|                          | REV      | GTGTATGTGGCAATGCGTTC     |
| <b><i>N-cadherin</i></b> | FWD      | ACAGTGGCCACCTACAAAGG     |
|                          | REV      | CCGAGATGGGGTTGATAATG     |
| <b><i>Slug</i></b>       | FWD      | GGGGAGAAGCCTTTTTCTTG     |
|                          | REV      | TCCTCATGTTTGTGCAGGAG     |
| <b><i>Snail</i></b>      | FWD      | CCTCCCTGTCAGATGAGGAC     |
|                          | REV      | CCAGGCTGAGGTATTCCTTG     |
| <b><i>Twist1</i></b>     | FWD      | GGAGTCCGCAGTCTTACGAG     |
|                          | REV      | TCTGGAGGACCTGGTAGAGG     |
| <b><i>36B4</i></b>       | FWD      | AATCCCTGACGCACCGCCGTGATG |
|                          | REV      | TGGGTTGTTTTCCAGGTGCCCTCG |

**Suppl. Table 1.** Sequences of primers used for real-time quantitative PCR amplification
